# Supplementary material for: A fully biobased tough hydrogel derived from guar gum and gelatin as a flexible sensor
Source: Royal Society of Chemistry journal article supplement (doi:10.1039/d4nj01833h), 2024-01-01
Supplement: d4nj01833h1.pdf [file d4nj01833h1.pdf]

## *Supporting information*

# Fully Biobased Tough Hydrogel Derived from Guar Gum and Gelatin as Flexible Sensor

Zixuan Wei <sup>a,§</sup>, Hongxin Zhou <sup>b,§</sup>, Yingying Meng <sup>a</sup>, Ting Wu <sup>c\*</sup>, Junjie Li <sup>d,e,\*</sup>, Yuping

Wei <sup>a, e, \*</sup>

<sup>a</sup> Department of Chemistry, School of Science, Tianjin University, Tianjin 300350, P. R. China.

<sup>b</sup> Department of Pharmaceutical Engineering, School of chemical engineering and technology, Tianjin University, Tianjin 300350, P. R. China.

<sup>c</sup> Department of Perfusion, Tianjin Chest Hospital, Tianjin, P. R. China.

<sup>d</sup> School of Chemical Engineering and Technology, Tianjin University, Tianjin 300350, P. R. China.

<sup>e</sup> Frontiers Science Center for Synthetic Biology and Key Laboratory of Systems Bioengineering (Ministry of Education), Tianjin University, Tianjin 300350, P. R. China.

**KEYWORDS:** Hydroxypropyl guar gum, Gelatin, Hydrogel, Conductivity, Flexible sensor

1. Tensile stress-strain curve of Gel-OHPG hydrogel with different AMS immersion time (Figure S1).
2. The stress-strain curves of the hydrogel before and after healing (Figure S2).
3. The swelling rate of Gel-OHPG hydrogel in deionized water (Figure S3).
4. The swelling rate of AMS-solution-soaked-hydrogel in PBS (Figure S4).
5. Comparison of reported hydrogel based on natural polymers with this work (Figure S5).

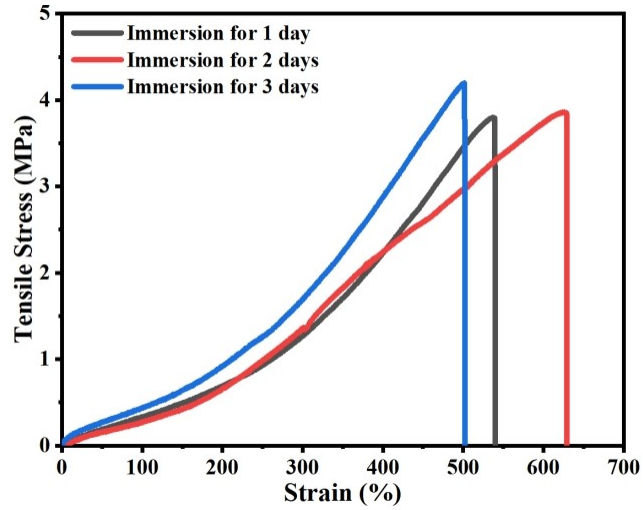

Figure. S1 Tensile stress-strain curve of Gel-OHPG hydrogel with different AMS immersion time.

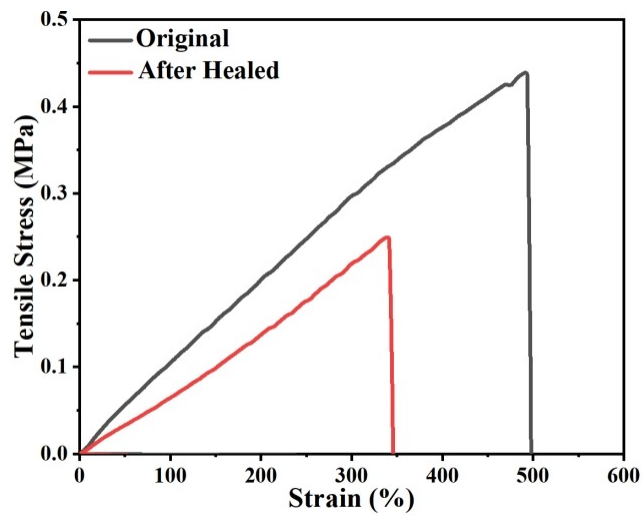

Figure S2. The stress-strain curves of the hydrogel before and after healing.

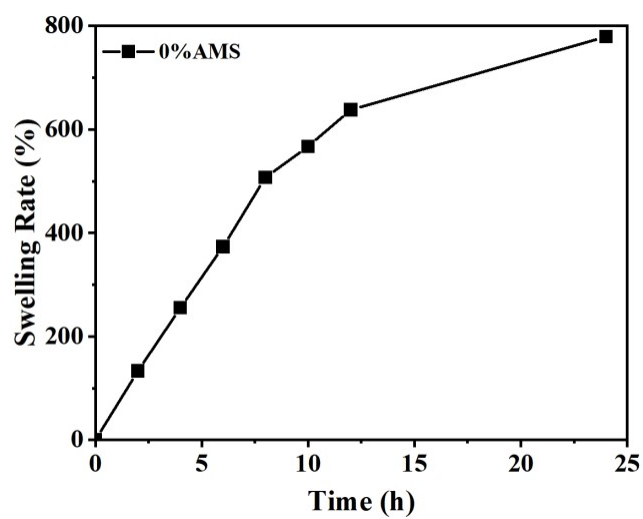

Figure S3. The swelling rate of Gel-OHPG hydrogel in deionized water.

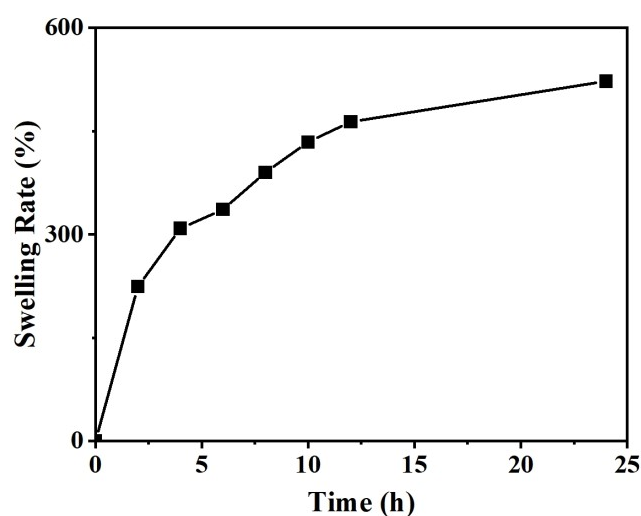

Figure S4. The swelling rate of AMS-solution-soaked-hydrogel in PBS.

Table S1. Comparison of reported natural polymer based hydrogel with this work

| Materials                                                            | Tensile Strength | Elongation at break | Tensile Toughness         | Compressive Strength | Compressive strain |
|----------------------------------------------------------------------|------------------|---------------------|---------------------------|----------------------|--------------------|
| Gel-OHPG (this work)                                                 | 0.438MPa         | 493%                | 1.19 MJ/m <sup>3</sup>    | 25.92MPa             | —                  |
| Gel-OHPG/AMS (this work)                                             | 3.86MPa          | 629%                | 10.46 MJ/m <sup>3</sup>   | 59.55MPa             | —                  |
| Gelatin/oxidized dextran/AMS <sup>1</sup>                            | 2.66 MPa         | 644%                | 7.67 MJ/m <sup>3</sup>    | 40.4 MPa             | 90.4%              |
| Gelatin/oxidized sodium carboxymethyl cellulose/AMS <sup>2</sup>     | 2.6MPa           | 614%                | 4.28 MJ/m <sup>3</sup>    | 64MPa                | 88.7%              |
| Guar gum/gellan gum/borax <sup>3</sup>                               | 28.2 kPa         | 216%                | —                         | —                    | —                  |
| Gelatin/sodium alginate/tannic acid/glycerol <sup>4</sup>            | 163.87 kPa       | 309.85%             | 1264.79 kJ/m <sup>3</sup> | —                    | —                  |
| Gelatin/AMS <sup>5</sup>                                             | 3.26MPa          | 528%                | —                         | 11.99MPa             | 99%                |
| Gelatin/oxidized sodium alginate/chitosan nanoparticles <sup>6</sup> | 40.52 kPa        | 493.91%             | 89.54 kJ/m <sup>3</sup>   | 2.43 MPa             | —                  |
| Gelatin/glycerol <sup>7</sup>                                        | 1.98MPa          | 475%                | —                         | 9.68MPa              | 88%                |
| Gelatin/oxidized starch <sup>8</sup>                                 | 120kPa           | 279%                | —                         | 14.28kPa             | —                  |

**References:**

- 1 X. Qin, Z. Zhao, J. Deng, Y. Zhao, S. Liang, Y. Yi, J. Li and Y. Wei, *Carbohydr. Polym.*, 2024, 335, 121920.
- 2 L. Cao, Z. Zhao, X. Wang, X. Huang, J. Li and Y. Wei, *Adv. Mater. Technol.*, 2022, 7, 2101382.
- 3 D. Cao, Y. Lv, Q. Zhou, Y. Chen and X. Qian, *Eur. Polym. J.*, 2021, 151, 110371.
- 4 X. Zhang, K. Liu, M. Qin, W. Lan, L. Wang, Z. Liang, X. Li, Y. Wei, Y. Hu, L. Zhao, X. Lian and D. Huang, *Carbohydr. Polym.*, 2023, 309, 120702.
- 5 Q. He, Y. Huang and S. Wang, *Adv. Funct. Mater.*, 2018, 28, 1705069.
- 6 L. T. Gao, Y. M. Chen, Y. Aziz, W. Wei, X. Y. Zhao, Y. He, J. Li, H. Li, H. Miyatake and Y. Ito, *Carbohydr. Polym.*, 2024, 330, 121812.
- 7 D. Zhou, F. Chen, J. Wang, T. Li, B. Li, J. Zhang, X. Zhou, T. Gan, S. Handschuh-Wang and X. Zhou, *J. Mater. Chem. B*, 2018, 6, 7366–7372.
- 8 Q. Mao, O. Hoffmann, K. Yu, F. Lu, G. Lan, F. Dai, S. Shang and R. Xie, *Mater. & Design*, 2020, 194, 108916.
